# Supplementary material for: The Comparative Analysis of the DNA Repeat Composition among <em>Cannabis Sativa</em> L., <em>Humulus Lupulus</em> L. And <em>Humulus Japonicus</em> Siebold & Zucc. With Heteromorphic Sex Chromosomes
Source: Preprints.org preprint supplement (doi:10.20944/preprints202112.0040.v1), 2021-12-03
Supplement: Supplementary file 3 [file Figure S3.pdf › Figure S3.pdf]

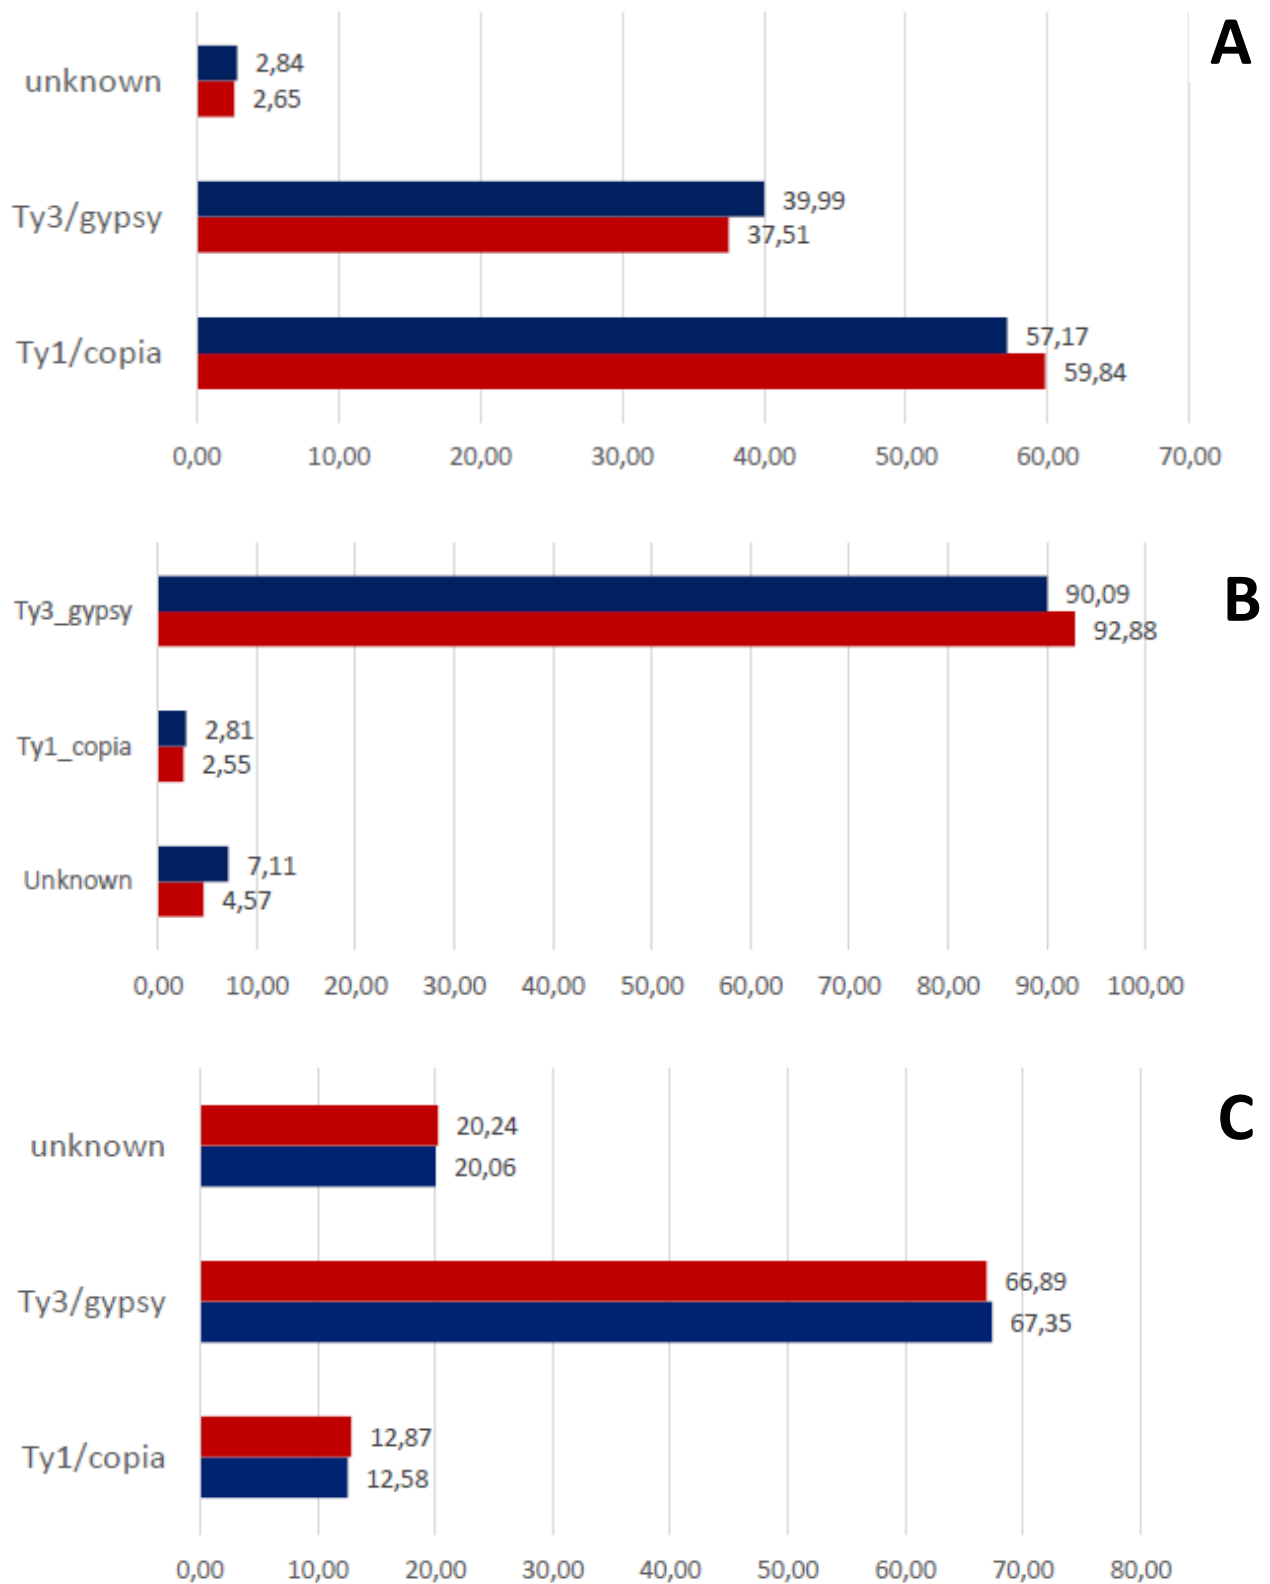

**Figure S3.** The ratios of the LTR superfamilies in the male (blue) and female (red) genomes of (A) *C. sativa*, (B) *H. japonicus* and (C) *H. lupulus*.
